# Supplementary material for: Physicochemical, antibacterial and aromatic qualities of herbaceous peony (Paeonia lactiflora pall) tea with different varieties
Source: PubMed Central journal article supplement — RSC Adv. 2024 Apr 30;14(20):14303–10. doi: 10.1039/d3ra08144c (PMC11060045; doi:10.1039/d3ra08144c), 2024-04-30
Supplement: RA-014-D3RA08144C-s001.pdf [file RA-014-D3RA08144C-s001.pdf]

1 **Supporting Information**

2 **TableS1 Sensory evaluation of herbaceous peony tea.**

3 Herbaceous peony tea quality evaluation and quality factor evaluation table

4 Tea number \_\_\_\_\_

| Factor              | Class | Quality characteristics                                                       | Scoring range | Score |
|---------------------|-------|-------------------------------------------------------------------------------|---------------|-------|
| Shape<br>(a)        | A     | Fine and tight , unique shape,<br>light green color, good clarity,<br>uniform | 90~99         |       |
|                     | B     | Relatively tender, relatively oily<br>color, general clarity, uniform         | 80~89         |       |
|                     | C     | Low tenderness, not obvious<br>styling features, poor color,<br>uneven        | 70~79         |       |
| Liquor color<br>(b) | A     | Bright yellow or bright green                                                 | 90~99         |       |
|                     | B     | Relatively bright or yellow-<br>green bright                                  | 80~89         |       |
|                     | C     | Dark yellow or cloudy                                                         | 70~79         |       |
| aroma<br>(c)        | A     | Fresh, rich, long-lasting, pure,                                              | 90~99         |       |
|                     | B     | Relatively fresh, relatively long-<br>lasting, purer                          | 80~89         |       |
|                     | C     | Relatively fresh, relatively long-<br>lasting, not pure                       | 70~79         |       |
| Taste<br>(d)        | A     | Sweet or fresh, mellow and<br>fresh, floral                                   | 90~99         |       |
|                     | B     | Refreshing, relatively mellow                                                 | 80~89         |       |
|                     | C     | Strong astringent, ripe                                                       | 70~79         |       |
| Leaf bottom<br>(e)  | A     | Light green bright, even and neat                                             | 90~99         |       |
|                     | B     | Bright, relatively uniform and<br>neat                                        | 80~89         |       |
|                     | C     | Tender, yellow-light                                                          | 70~79         |       |

6 **TableS2. Determination of volatile components in different varieties of HPT by GC-QTOF.**

| No | Class    | ID                        | CAS         | Compound | Library | SS                | MC                 | MT                 | AC                | YF                |
|----|----------|---------------------------|-------------|----------|---------|-------------------|--------------------|--------------------|-------------------|-------------------|
|    |          |                           |             | RI       | RI      |                   |                    |                    |                   |                   |
| 1  |          | Phellandral               | 21391-98-0  | 1277     | 1276    | 9693.8 ± 1328.43  | 0 ± 0              | 0 ± 0              | 2770.59 ± 841.98  | 0 ± 0             |
| 2  |          | Panaginsene               | 871660-96-7 | 1334     | 1338    | 7658.55 ± 1379.31 | 0 ± 0              | 2148.74 ± 151.78   | 0 ± 0             | 0 ± 0             |
| 3  |          | Neral                     | 106-26-3    | 1243     | 1240    | 0 ± 0             | 635.15 ± 268.63    | 1715.01 ± 679.6    | 910.98 ± 252.85   | 2335.41 ± 980.77  |
| 4  |          | L-.alpha.-Terpineol       | 10482-56-1  | 1192     | 1190    | 1547.66 ± 114.42  | 1838.77 ± 771.15   | 1072.16 ± 198.78   | 7660 ± 2179.73    | 979.08 ± 301.1    |
| 5  |          | Humulene                  | 6753-98-6   | 1458     | 1454    | 7214.21 ± 885.72  | 0 ± 0              | 4386.99 ± 1232.26  | 0 ± 0             | 0 ± 0             |
| 6  |          | Ginsinsene                | 871660-97-8 | 1352     | 1355    | 0 ± 0             | 0 ± 0              | 1566.96 ± 45.98    | 0 ± 0             | 0 ± 0             |
| 7  |          | Geraniol                  | 106-24-1    | 1256     | 1255    | 0 ± 0             | 0 ± 0              | 0 ± 0              | 0 ± 0             | 2261.82 ± 731.24  |
| 8  |          | Verbenone                 | 1196-01-6   | 1212     | 1204    | 1266.95 ± 300.46  | 493.88 ± 188.07    | 0 ± 0              | 298.8 ± 110.25    | 181.07 ± 35.73    |
| 9  |          | Myrtenal                  | 564-94-3    | 1198     | 1193    | 1550.54 ± 249.96  | 452.89 ± 188.99    | 2691.06 ± 303.17   | 1282.38 ± 355.53  | 1217.75 ± 408.8   |
| 10 | Terpenes | Geranylacetone            | 3796-70-1   | 1455     | 1453    | 0 ± 0             | 1652.57 ± 991.07   | 0 ± 0              | 5179.21 ± 1984.2  | 2741 ± 965.04     |
|    |          |                           |             |          |         | 39844.43 ±        |                    |                    |                   |                   |
| 11 |          | beta-Patchoulene          | 514-51-2    | 1375     | 1381    | 7485.72           | 2445.77 ± 1213.39  | 27419.49 ± 132.22  | 2694.27 ± 1296.95 | 0 ± 0             |
|    |          | 6,10,14-                  |             |          |         | 5620.9 ± 221.12   | 10068.97 ± 7702.75 | 4749.42 ± 1108.49  | 11637.12 ±        | 5924.62 ± 2524.97 |
| 12 |          | Trimethylpentadecan-2-one | 502-69-2    | 1853     | 1844    |                   |                    |                    | 2927.11           |                   |
| 13 |          | Nerol oxide               | 1786-08-9   | 1157     | 1153    | 0 ± 0             | 0 ± 0              | 1902.84 ± 534.9    | 0 ± 0             | 981.73 ± 308.43   |
| 14 |          | Geranic acid              | 1022164     | 1363     | 1355    | 0 ± 0             | 0 ± 0              | 0 ± 0              | 0 ± 0             | 5632.69 ± 825.85  |
| 15 |          | (-)-cis-rose oxide        | 3033-23-6   | 1113     | 1114    | 0 ± 0             | 0 ± 0              | 11699.51 ± 1644.34 | 0 ± 0             | 0 ± 0             |
| 16 |          | trans-Rose oxide          | 1226797     | 1129     | 1127    | 0 ± 0             | 0 ± 0              | 5022.86 ± 700.75   | 0 ± 0             | 747.81 ± 190.07   |
| 17 |          | (-)-alpha-Isocomene       | 65372-78-3  | 1383     | 1386    | 5708.52 ± 1304.08 | 0 ± 0              | 3610.01 ± 102.99   | 0 ± 0             | 0 ± 0             |
| 18 | Others   | 1,4-Dimethoxybenzene      | 150-78-7    | 1165     | 1168    | 1967.27 ± 297.54  | 0 ± 0              | 0 ± 0              | 0 ± 0             | 0 ± 0             |
| 19 |          | 1,2-Dimethoxybenzene      | 91-16-7     | 1149     | 1148    | 959.52 ± 184.67   | 0 ± 0              | 364.43 ± 93.85     | 335.13 ± 104.99   | 0 ± 0             |

|    |         |                                                                                   |              |      |      |                    |                   |                   |                    |                   |
|----|---------|-----------------------------------------------------------------------------------|--------------|------|------|--------------------|-------------------|-------------------|--------------------|-------------------|
| 20 |         | Formic acid, 2-phenylethyl ester                                                  | 104-62-1     | 1178 | 1178 | 0 ± 0              | 1073.08 ± 422.04  | 0 ± 0             | 0 ± 0              | 680.1 ± 220.32    |
| 21 |         | 1-methyl-5-prop-1-en-2-ylcyclohexene                                              | 1461-27-4    | 1029 | 1027 | 3999.31 ± 618.75   | 1963.98 ± 893.68  | 0 ± 0             | 10122.12 ± 3574.39 | 2112.58 ± 670.16  |
| 22 |         | Decylcyclohexane                                                                  | 1795-16-0    | 1656 | 1656 | 1286.25 ± 73.72    | 0 ± 0             | 624.37 ± 30.8     | 485.01 ± 188.54    | 418.5 ± 132.4     |
| 23 |         | 1,3-p-Menthadien-7-al                                                             | 1197-15-5    | 1286 | 1283 | 1608.11 ± 184.98   | 0 ± 0             | 1621.04 ± 319.74  | 1729.42 ± 140.01   | 0 ± 0             |
| 24 |         | 2-Octyl benzoate                                                                  | 6938-51-8    | 1713 | 1692 | 0 ± 0              | 9842.67 ± 7347.61 | 0 ± 0             | 0 ± 0              | 0 ± 0             |
| 25 |         | 2,6-Di-tert-butylbenzoquinone                                                     | 719-22-2     | 1470 | 1471 | 0 ± 0              | 764.24 ± 301.26   | 0 ± 0             | 0 ± 0              | 0 ± 0             |
| 26 |         | 10,10-Dimethyl-2,6-dimethylenebicyclo[7.2.0]undecan-5-ylol                        | 19431-80-2   | 1642 | 1644 | 0 ± 0              | 0 ± 0             | 783.92 ± 64.12    | 0 ± 0              | 0 ± 0             |
| 27 |         | (-)-Tricyclo[6.2.1.0(4,11)]undec-5-ene, 1,5,9,9-tetramethyl-(isocaryophyllene-11) | 1000154-06-7 | 1400 | 1403 | 29894.39 ± 4470.17 | 0 ± 0             | 0 ± 0             | 0 ± 0              | 0 ± 0             |
| 28 |         | 1-methylperhydrophenanthrene                                                      | 1000080-19-6 | 1474 | 1544 | 0 ± 0              | 0 ± 0             | 0 ± 0             | 1343.14 ± 603.02   | 0 ± 0             |
| 29 |         | Benzoic acid, 2-ethylhexyl ester                                                  | 5444-75-7    | 1713 | 1735 | 0 ± 0              | 0 ± 0             | 10941.44 ± 111.42 | 5522.94 ± 1899.21  | 6354.39 ± 2220.52 |
| 30 |         | Perilla ketone                                                                    | 553-84-4     | 1251 | 1251 | 2604.65 ± 336.88   | 2502.71 ± 1198.73 | 4049.77 ± 234.97  | 1133.43 ± 347.8    | 872.16 ± 287.81   |
| 31 | Ketones | 2',4'-Dimethylacetophenone                                                        | 89-74-7      | 1217 | 1221 | 0 ± 0              | 7928.45 ± 3055.47 | 0 ± 0             | 0 ± 0              | 0 ± 0             |
| 32 |         | 6-Methyl-5-hepten-2-one                                                           | 110-93-0     | 988  | 986  | 0 ± 0              | 0 ± 0             | 767.51 ± 275.98   | 0 ± 0              | 0 ± 0             |

|    |              |                             |            |      |      |                   |                   |                   |                   |                   |                   |
|----|--------------|-----------------------------|------------|------|------|-------------------|-------------------|-------------------|-------------------|-------------------|-------------------|
| 33 |              | 3-Octen-2-one               | 1669-44-9  | 1041 | 1040 | 0 ± 0             | 0 ± 0             | 571.06 ± 227.74   | 706.12 ± 169.81   | 0 ± 0             |                   |
| 34 |              | 3,5-Octadien-2-one          | 30086-02-3 | 1073 | 1073 | 0 ± 0             | 0 ± 0             | 0 ± 0             | 4068.59 ± 1426.36 | 0 ± 0             |                   |
| 35 |              | 2,6,10-Trimethyltridecane   | 3891-99-4  | 1434 | 1449 | 1859.28 ± 197.97  | 0 ± 0             | 0 ± 0             | 0 ± 0             | 0 ± 0             |                   |
| 36 |              | 5-Methyltridecane           | 25117-31-1 | 1355 | 1348 | 2940.31 ± 83.76   | 0 ± 0             | 0 ± 0             | 894.02 ± 414.54   | 930.15 ± 447.56   |                   |
| 37 |              | 3-Methyltridecane           | 6418-41-3  | 1371 | 1371 | 1851.69 ± 158.36  | 348.45 ± 245.6    | 874.75 ± 60.11    | 660.58 ± 207.44   | 608.17 ± 179.64   |                   |
| 38 |              | Tridecane                   | 629-50-5   | 1301 | 1300 | 5162.41 ± 975.1   | 1120.1 ± 1475.39  | 3938.34 ± 632.16  | 1504.16 ± 520.44  | 1478.66 ± 456.47  |                   |
| 39 |              | Tricosane                   | 638-67-5   | 2300 | 2300 | 1204.85 ± 316.04  | 6275.02 ± 5928.72 | 0 ± 0             | 0 ± 0             | 0 ± 0             |                   |
| 40 |              | Tetradecahydroanthracene    | 28071-99-0 | 1482 | 1483 | 1929.64 ± 176.45  | 758.7 ± 501.75    | 0 ± 0             | 2148.22 ± 804.58  | 1434.12 ± 592.08  |                   |
| 41 |              | 3-Methyltetradecane         | 18435-22-8 | 1472 | 1470 | 2295.83 ± 504.28  | 630.62 ± 481.24   | 1024.1 ± 139.48   | 1492.24 ± 553.46  | 973.14 ± 283.06   |                   |
| 42 |              | Tetradecane                 | 629-59-4   | 1400 | 1400 | 1816.29           | 12918.92 ±        | 4355.85 ± 2271.28 | 9169.76 ± 828.73  | 4927.64 ± 2626.77 | 4154.06 ± 1643.23 |
| 43 |              | 7-Methylpentadecane         | 6165-40-8  | 1542 | 1541 | 7010.27 ± 2616.63 | 0 ± 0             | 916.31 ± 104.91   | 0 ± 0             | 0 ± 0             |                   |
| 44 | hydrocarbons | 3-Methylpentadecane         | 2882-96-4  | 1571 | 1570 | 0 ± 0             | 0 ± 0             | 1270.23 ± 11.13   | 0 ± 0             | 0 ± 0             |                   |
| 45 |              | 2-Methylpentadecane         | 1560-93-6  | 1564 | 1563 | 0 ± 0             | 0 ± 0             | 1443.46 ± 28.36   | 0 ± 0             | 0 ± 0             |                   |
| 46 |              | 2,6,10-Trimethylpentadecane | 3892-00-0  | 1649 | 1633 | 1920.62 ± 86.72   | 0 ± 0             | 1094.4 ± 45.26    | 746.52 ± 254.69   | 0 ± 0             |                   |
| 47 |              | Pentadecane                 | 629-62-9   | 1500 | 1500 | 9739.56 ± 867.58  | 3716.08 ± 2364.3  | 5999.55 ± 73.97   | 4839.96 ± 1925.29 | 3484.44 ± 1231.61 |                   |
| 48 |              | Pentacosane                 | 629-99-2   | 2501 | 2500 | 420.36 ± 122.34   | 1525.97 ± 1559.47 | 871.42 ± 10.7     | 276.38 ± 82.7     | 259.49 ± 126.27   |                   |
| 49 |              | o-Cymene                    | 527-84-4   | 1025 | 1022 | 5181.63           | 32562.07 ±        | 0 ± 0             | 9756.77 ± 1631.48 | 6527.71 ± 1956.8  | 0 ± 0             |
| 50 |              | 4,5-Dimethylnonane          | 17302-23-7 | 1051 | 1046 | 715.73 ± 435.84   | 700.4 ± 297.74    | 426.98 ± 116.43   | 0 ± 0             | 565.72 ± 652.01   |                   |
| 51 |              | Nonadecane                  | 629-92-5   | 1900 | 1900 | 191.87 ± 36.22    | 941.16 ± 864.19   | 0 ± 0             | 0 ± 0             | 0 ± 0             |                   |
| 52 |              | Neophytadiene               | 504-96-1   | 1846 | 1837 | 537.63 ± 473.98   | 1075.49 ± 1149.88 | 0 ± 0             | 0 ± 0             | 268.17 ± 178.44   |                   |
| 53 |              | Naphthalene                 | 91-20-3    | 1184 | 1182 | 870.05 ± 119.69   | 284.79 ± 110.86   | 911.4 ± 204.28    | 398.64 ± 150.27   | 464.12 ± 130.12   |                   |

|    |                          |            |      |      |                   |                   |                  |                   |                   |
|----|--------------------------|------------|------|------|-------------------|-------------------|------------------|-------------------|-------------------|
| 54 | Hexadecane               | 544-76-3   | 1600 | 1600 | 9239.44 ± 743.91  | 4878.27 ± 3298.39 | 5868.24 ± 466.46 | 3360.62 ± 1185.1  | 3208.35 ± 663.66  |
| 55 | Heptadecane              | 629-78-7   | 1700 | 1700 | 2869.5 ± 59.22    | 1661.69 ± 1308.88 | 1443.19 ± 82.55  | 892.54 ± 294.72   | 932.41 ± 196.44   |
| 56 | Heneicosane              | 629-94-7   | 2101 | 2100 | 474.47 ± 113.24   | 6980.21 ± 6249.18 | 1787.21 ± 572.21 | 1038.21 ± 271.46  | 1099.71 ± 468.86  |
| 57 | 4,6-Dimethyldodecane     | 61141-72-8 | 1337 | 1325 | 9093.78 ± 3227.95 | 0 ± 0             | 911.99 ± 115.37  | 1702.03 ± 329.22  | 1659.99 ± 1.84    |
| 58 | 2,7,10-Trimethyldodecane | 74645-98-0 | 1328 | 1320 | 7783.38           | 1842.63 ± 797.27  | 2141.91 ± 134.03 | 3349.81 ± 761.79  | 3392.01 ± 221.4   |
| 59 | 2,6,11-Trimethyldodecane | 31295-56-4 | 1282 | 1275 | 10056.79          | 4002.11 ± 3396.11 | 5398.43 ± 13.79  | 6504.51 ± 202.89  | 5376.96 ± 201.68  |
| 60 | 2,6,10-Trimethyldodecane | 3891-98-3  | 1378 | 1366 | 3959.43 ± 688.99  | 980.76 ± 554.29   | 1873.75 ± 257.52 | 1695.59 ± 807.01  | 1274.68 ± 329.23  |
| 61 | Dodecane                 | 112-40-3   | 1201 | 1200 | 2476.98 ± 71.58   | 416.68 ± 191.32   | 1183.28 ± 121.18 | 481.34 ± 165.57   | 488.19 ± 132.09   |
| 62 | Docosane                 | 629-97-0   | 2200 | 2200 | 151.94 ± 54.31    | 836.68 ± 831.48   | 472.58 ± 118.35  | 270.5 ± 79.78     | 326.85 ± 144.12   |
| 63 | 4-Methyldecane           | 2847-72-5  | 1059 | 1060 | 10052.44          | 0 ± 0             | 0 ± 0            | 0 ± 0             | 0 ± 0             |
| 64 | 2,4-Dimethyldecane       | 2801-84-5  | 1104 | 1106 | 13253.6 ± 6043.03 | 464.68 ± 49.1     | 995.94 ± 548.7   | 1106.36 ± 23.03   | 763.88 ± 151.4    |
| 65 | 2,3,7-Trimethyldecane    | 62238-13-5 | 1463 | 1466 | 8826.77 ± 1160.43 | 2512.05 ± 1559.79 | 3694.39 ± 96     | 4745.82 ± 2145.67 | 0 ± 0             |
| 66 | Caryophyllene            | 87-44-5    | 1424 | 1419 | 11303.67          | 2649.74 ± 1665.61 | 19084.32 ± 59.17 | 6317.6 ± 2021.48  | 4045.43 ± 1516.94 |
| 67 | M-Cymene                 | 535-77-3   | 1026 | 1023 | 0 ± 0             | 909.15 ± 368.89   | 0 ± 0            | 0 ± 0             | 954.96 ± 319.95   |
| 68 | alpha,3-Dimethylstyrene  | 1124-20-5  | 1091 | 1082 | 8533.29 ± 1781.06 | 656.64 ± 317.07   | 3971.19 ± 621.75 | 0 ± 0             | 0 ± 0             |
| 69 | 2,4-Di-tert-butylphenol  | 96-76-4    | 1513 | 1519 | 2501.77 ± 903.9   | 1408.67 ± 1261.31 | 974.4 ± 156.58   | 1314.29 ± 443.83  | 1220.88 ± 551.29  |
| 70 | Geraniolene              | 6709-39-3  | 883  | 856  | 0 ± 0             | 0 ± 0             | 722.55 ± 22.41   | 0 ± 0             | 280.62 ± 98.85    |
| 71 | alpha-Terpinene          | 99-86-5    | 1017 | 1017 | 1272.37 ± 231.16  | 276.35 ± 151.29   | 398.62 ± 82.74   | 1455.17 ± 544.32  | 275.57 ± 109.73   |
| 72 | 1,2,4-Trimethoxybenzene  | 135-77-3   | 1373 | 1372 | 2001.74 ± 134.1   | 0 ± 0             | 0 ± 0            | 0 ± 0             | 0 ± 0             |
| 73 | .gamma.-Terpinene        | 99-85-4    | 1060 | 1060 | 1364.67 ± 140.79  | 347.25 ± 0        | 477.26 ± 0       | 1432.62 ± 0       | 237.38 ± 0        |

|    |              |                                                          |            |      |      |                   |                     |                     |                   |                     |
|----|--------------|----------------------------------------------------------|------------|------|------|-------------------|---------------------|---------------------|-------------------|---------------------|
| 74 |              | .alpha.-Phellandrene                                     | 99-83-2    | 1005 | 1005 | 0 ± 0             | 206.43 ± 98.38      | 0 ± 0               | 823.48 ± 343.04   | 0 ± 0               |
| 75 |              | 7-Methylhexadecane                                       | 26730-20-1 | 1646 | 1641 | 1516.77 ± 80.5    | 0 ± 0               | 812.22 ± 129.79     | 0 ± 0             | 0 ± 0               |
| 76 |              | 3-Methylhexadecane                                       | 6418-43-5  | 1671 | 1671 | 938.95 ± 68.02    | 0 ± 0               | 0 ± 0               | 0 ± 0             | 0 ± 0               |
| 77 |              | 2-Pentylfuran                                            | 3777-69-3  | 992  | 993  | 2123.96 ± 426.39  | 0 ± 0               | 5289.23 ± 1196.62   | 1985.46 ± 467.29  | 0 ± 0               |
| 78 |              | Dill ether                                               | 74410-10-9 | 1187 | 1186 | 0 ± 0             | 0 ± 0               | 0 ± 0               | 920.25 ± 241.56   | 272.75 ± 17.27      |
| 79 |              | 4,7-Dimethylbenzofuran                                   | 28715-26-6 | 1215 | 1220 | 7576.76 ± 1206.73 | 54952.29 ± 26038.91 | 20208.98 ± 1764.82  | 4105.36 ± 1484.35 | 1985.65 ± 746.72    |
|    | Heterocyclic | 7,9-ditert-butyl-1-oxaspiro[4.5]deca-6,9-diene-2,8-dione | 82304-66-3 | 1928 | 1923 | 898.66 ± 86.66    | 946.64 ± 350.19     | 739.45 ± 221.41     | 724.6 ± 382.32    | 0 ± 0               |
| 80 |              | 2,8-dione                                                | 82304-66-3 | 1928 | 1923 |                   |                     |                     |                   |                     |
| 81 |              | 3-Furaldehyde                                            | 498-60-2   | 831  | 832  | 0 ± 0             | 0 ± 0               | 1344.01 ± 561.59    | 604.55 ± 98.22    | 485.46 ± 175.69     |
| 82 |              | Linalyl oxide                                            | 5989-33-3  | 1074 | 1074 | 0 ± 0             | 0 ± 0               | 0 ± 0               | 0 ± 0             | 2079.56 ± 564.94    |
| 83 |              | Nonanal                                                  | 124-19-6   | 1106 | 1104 | 10132.1 ± 1722.8  | 4586.85 ± 1793.14   | 11576.24 ± 6173.06  | 4071.89 ± 1494.7  | 4427.66 ± 1249.49   |
| 84 |              | Hexanal                                                  | 66-25-1    | 797  | 800  | 3558.46 ± 303.88  | 1662.04 ± 531.89    | 9594.46 ± 510.82    | 5259 ± 1553.49    | 732.59 ± 224.99     |
| 85 |              | Heptanal                                                 | 111-71-7   | 902  | 901  | 539.67 ± 87.23    | 222.07 ± 69         | 977.39 ± 258.51     | 336.43 ± 105.93   | 0 ± 0               |
| 86 |              | Decanal                                                  | 112-31-2   | 1207 | 1206 | 4084.9 ± 880.95   | 1273.65 ± 678.99    | 3771.16 ± 806.57    | 0 ± 0             | 1535.23 ± 597       |
| 87 |              | Citral                                                   | 5392-40-5  | 1272 | 1276 | 0 ± 0             | 1368.11 ± 623.36    | 3414.66 ± 484.79    | 2160.08 ± 716.86  | 4484.38 ± 1705.28   |
| 88 | Aldehydes    | Myrtanal                                                 | 4764-14-1  | 1184 | 1188 | 2367.06 ± 536.14  | 816.2 ± 350.19      | 1854.79 ± 308.81    | 603 ± 179.71      | 838.05 ± 319.15     |
| 89 |              | Benzeneacetaldehyde                                      | 122-78-1   | 1045 | 1045 | 4242.01 ± 986.72  | 4319.17 ± 1585.98   | 2180.88 ± 896.38    | 8945.82 ± 3232.8  | 3028.37 ± 1094.39   |
| 90 |              | 4-Isopropylbenzaldehyde                                  | 122-03-2   | 1242 | 1239 | 1643.05 ± 599.78  | 680.16 ± 370.65     | 1372.31 ± 119.87    | 3097.8 ± 824.23   | 0 ± 0               |
| 91 |              | Benzaldehyde                                             | 100-52-7   | 960  | 962  | 7561.64 ± 2090.33 | 6756.31 ± 1986.68   | 3039.3 ± 1162.75    | 4242.1 ± 1033.95  | 1677.44 ± 695.65    |
| 92 |              | P-Menth-1-en-9-al                                        | 29548-14-9 | 1220 | 1229 | 0 ± 0             | 759.26 ± 325.1      | 0 ± 0               | 3823.52 ± 1193.56 | 902.17 ± 228.01     |
| 93 |              | 2-Octenal                                                | 2548-87-0  | 1059 | 1060 | 0 ± 0             | 0 ± 0               | 1299.49 ± 494.68    | 538.48 ± 189.7    | 0 ± 0               |
| 94 |              | 2-Nonenal                                                | 18829-56-6 | 1161 | 1162 | 2804.1 ± 346.2    | 708.61 ± 410.24     | 2914.02 ± 511.61    | 1422.48 ± 580.41  | 779.18 ± 253.97     |
| 95 | Alcohols     | Phenylethyl Alcohol                                      | 60-12-8    | 1115 | 1116 | 26153.15 ±        | 258745.7 ±          | 233169.7 ± 77987.39 | 102424.8 ±        | 118757.5 ± 62280.47 |

|     |                   |                                  |          |      |                  |                     |                   |                    |                   |                  |
|-----|-------------------|----------------------------------|----------|------|------------------|---------------------|-------------------|--------------------|-------------------|------------------|
|     |                   |                                  |          |      | 5732.13          | 104192.06           |                   | 38423.49           |                   |                  |
| 96  | p-Cymen-7-ol      | 536-60-7                         | 1293     | 1289 | 1598.55 ± 724.99 | 0 ± 0               | 1555.81 ± 185.01  | 0 ± 0              | 0 ± 0             |                  |
| 97  | l-Menthone        | 14073-97-3                       | 1156     | 1148 | 0 ± 0            | 0 ± 0               | 744.76 ± 69.04    | 0 ± 0              | 0 ± 0             |                  |
| 98  | Linalool          | 78-70-6                          | 1101     | 1099 | 0 ± 0            | 2871.75 ± 1038.01   | 2206.37 ± 528.84  | 10698.35 ± 3346.82 | 2634.48 ± 667.23  |                  |
| 99  | dl-Menthol        | 89-78-1                          | 1175     | 1174 | 0 ± 0            | 1090.24 ± 414.65    | 0 ± 0             | 0 ± 0              | 0 ± 0             |                  |
| 100 | Menthol           | 15356-70-4                       | 1174     | 1164 | 3640.05 ± 547.35 | 0 ± 0               | 0 ± 0             | 0 ± 0              | 0 ± 0             |                  |
| 101 | Citronellol       | 106-22-9                         | 1230     | 1228 | 1148.85 ± 224.49 | 384.99 ± 254.36     | 7408.53 ± 716.37  | 484.47 ± 125.84    | 1384.14 ± 488.43  |                  |
| 102 | Benzyl alcohol    | 100-51-6                         | 1036     | 1036 | 3419.62 ± 952.34 | 0 ± 0               | 0 ± 0             | 0 ± 0              | 0 ± 0             |                  |
| 103 | 1-Octen-3-ol      | 3391-86-4                        | 980      | 980  | 0 ± 0            | 0 ± 0               | 800.97 ± 349.74   | 447.03 ± 64.99     | 106.41 ± 41.01    |                  |
| 104 | 2-Ethylhexan-1-ol | 104-76-7                         | 1030     | 1030 | 1242.18 ± 251.8  | 766.18 ± 310.35     | 1314.14 ± 567.64  | 0 ± 0              | 597.21 ± 266.68   |                  |
| 105 | Nonanoic acid     | 112-05-0                         | 1287     | 1273 | 0 ± 0            | 39991.15 ± 52208.82 | 0 ± 0             | 0 ± 0              | 0 ± 0             |                  |
| 106 | Methyleugenol     | 93-15-2                          | 1406     | 1402 | 0 ± 0            | 0 ± 0               | 0 ± 0             | 797.86 ± 214.48    | 0 ± 0             |                  |
| 107 | Hexanoic acid     | 142-62-1                         | 981      | 990  | 0 ± 0            | 0 ± 0               | 2748.01 ± 1199.3  | 0 ± 0              | 0 ± 0             |                  |
| 108 | Heptanoic acid    | 111-14-8                         | 1078     | 1078 | 0 ± 0            | 0 ± 0               | 1597.61 ± 636.4   | 0 ± 0              | 0 ± 0             |                  |
| 109 | Eugenol           | 97-53-0                          | 1360     | 1357 | 0 ± 0            | 439.58 ± 281.3      | 3259.26 ± 42.8    | 659.71 ± 228.91    | 983.56 ± 517.58   |                  |
| 110 | Acids             | Dimethyl phthalate               | 131-11-3 | 1457 | 1454             | 6848.96 ± 336.81    | 7430.18 ± 5051.95 | 6132.68 ± 311.62   | 4182.26 ± 1094.77 | 4478.47 ± 1657.1 |
| 111 |                   | Diethyl Phthalate                | 84-66-2  | 1597 | 1594             | 744.5 ± 106.38      | 190.53 ± 122.86   | 173.54 ± 20.15     | 99.64 ± 20.52     | 153.68 ± 2.87    |
| 112 |                   | Dibutyl phthalate                | 84-74-2  | 1971 | 1965             | 1189.66 ± 251.06    | 1701.85 ± 99.13   | 880.77 ± 205.52    | 500.33 ± 1.77     | 679.76 ± 335.17  |
| 113 |                   | Benzoic acid                     | 93-58-3  | 1167 | 1170             | 0 ± 0               | 602.68 ± 82.11    | 277.84 ± 59.12     | 0 ± 0             | 1023 ± 454.41    |
| 114 |                   | Acetic acid, 2-phenylethyl ester | 103-45-7 | 1259 | 1258             | 1436.37 ± 40.18     | 1844.31 ± 846.69  | 2959.98 ± 154.39   | 2663.82 ± 885.08  | 0 ± 0            |
| 115 |                   | Diisobutyl phthalate             | 84-69-5  | 1876 | 1870             | 1487.65 ± 198.32    | 2097.78 ± 372.72  | 1122.6 ± 293.07    | 730.81 ± 27.87    | 1262.73 ± 656.3  |

7 Identification method. MS, identification based on the NIST 2017 mass spectral database; HP-5MS UI (30 m × 0.25 mm × 0.25 μm, Agilent 7890B-7200, USA) was used for RI determination.

8

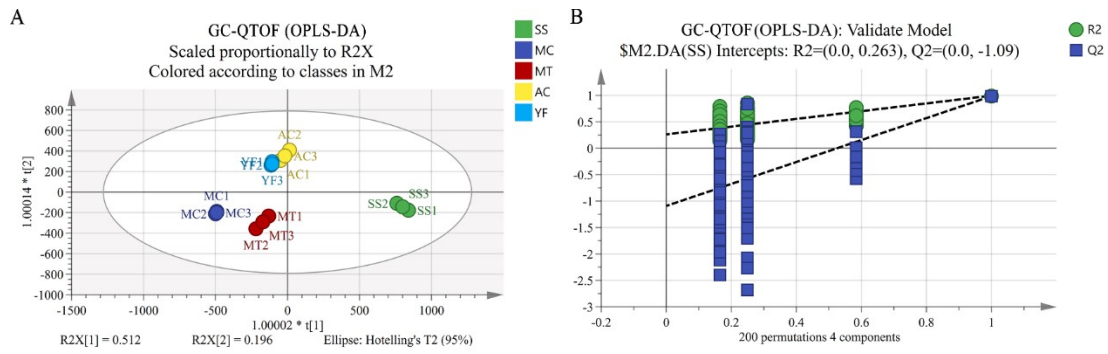

9

10 **FigureS1. OPLS-DA analysis and model monitoring of volatile components with HPT**

11 The criteria for validity are: All blue Q2-values to the left are lower than the original points to the  
12 right. Or the blue regression line of the Q2-points intersects the vertical axis (on the left) at, or below  
13 zero. Note that the R2-values always show some degree of optimism. However, when all green R2-  
14 values to the left are lower than the original point to the right, this is also an indication for the  
15 validity of the original model.

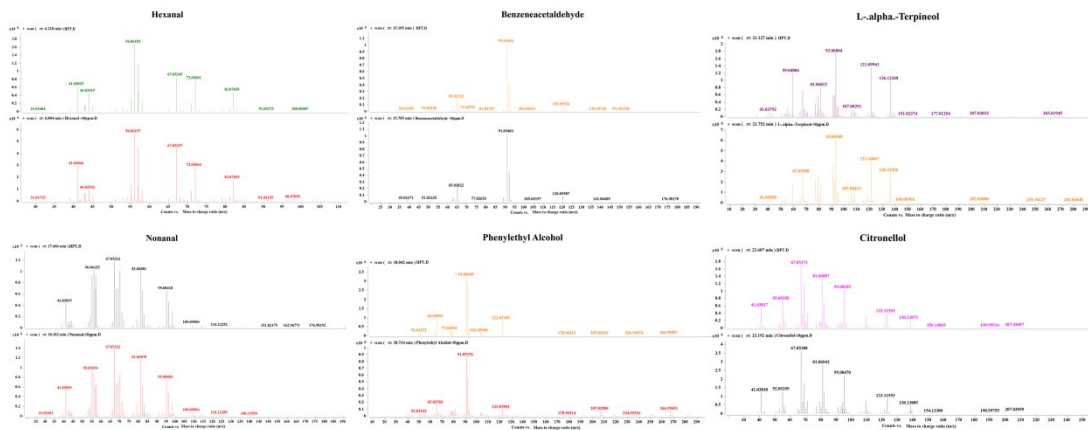

16

17 **FigureS2. Mass-charge ratio analysis of standard and HPT.**

18



**TableS3 Characteristic volatile components of HPT by Venn analysis.**

| HPG                                                         | CAS        | Content( $\mu\text{g}/$ |
|-------------------------------------------------------------|------------|-------------------------|
| T ID                                                        |            | L)                      |
|                                                             |            | 2001.74 $\pm$           |
| 1,2,4-Trimethoxybenzene                                     | 135-77-3   | 134.1                   |
|                                                             |            | 938.95 $\pm$            |
| 3-Methylhexadecane                                          | 6418-43-5  | 68.02                   |
|                                                             |            | 3419.62 $\pm$           |
| Benzyl alcohol                                              | 100-51-6   | 952.34                  |
|                                                             |            | 10976.25 $\pm$          |
| 4-Methyldecane                                              | 2847-72-5  | 10052.44                |
| SS                                                          |            | 3640.05 $\pm$           |
| Menthol                                                     | 15356-70-4 | 547.35                  |
|                                                             |            | 1967.27 $\pm$           |
| 1,4-Dimethoxybenzene                                        | 150-78-7   | 297.54                  |
| (-)-Tricyclo[6.2.1.0(4,11)]undec-5-ene,1,5,9,9-tetramethyl- | 1000154-   | 29894.39 $\pm$          |
| (isocaryophyllene-II)                                       | 06-7       | 4470.17                 |
|                                                             |            | 1859.28 $\pm$           |
| 2,6,10-Trimethyltridecane                                   | 3891-99-4  | 197.97                  |
|                                                             |            | 9842.67 $\pm$           |
| 2-Octyl benzoate                                            | 6938-51-8  | 7347.61                 |
|                                                             |            | 39991.15 $\pm$          |
| Nonanoic acid                                               | 112-05-0   | 52208.82                |
|                                                             |            | 764.24 $\pm$            |
| MC                                                          |            |                         |
| 2,6-Di-tert-butylbenzoquinone                               | 719-22-2   | 301.26                  |
|                                                             |            | 1090.24 $\pm$           |
| dl-Menthol                                                  | 89-78-1    | 414.65                  |
|                                                             |            | 7928.45 $\pm$           |
| 2',4'-Dimethylacetophenone                                  | 89-74-7    | 3055.47                 |

|    |                                                      |            |            |
|----|------------------------------------------------------|------------|------------|
|    |                                                      |            | 1270.23 ±  |
|    | 3-Methylpentadecane                                  | 2882-96-4  | 11.13      |
|    |                                                      |            | 1597.61 ±  |
|    | Heptanoic acid                                       | 111-14-8   | 636.4      |
|    | 10,10-Dimethyl-2,6-dimethylenebicyclo[7.2.0]undecan- |            | 783.92 ±   |
|    | 5.beta.-ol                                           | 19431-80-2 | 64.12      |
|    |                                                      | 871660-97- | 1566.96 ±  |
|    | Ginsinsene                                           | 8          | 45.98      |
|    |                                                      |            | 2748.01 ±  |
| MT | Hexanoic acid                                        | 142-62-1   | 1199.3     |
|    |                                                      |            | 11699.51 ± |
|    | (-)-cis-rose oxide                                   | 3033-23-6  | 1644.34    |
|    |                                                      |            | 767.51 ±   |
|    | 6-Methyl-5-hepten-2-one                              | 110-93-0   | 275.98     |
|    |                                                      |            | 744.76 ±   |
|    | l-Menthone                                           | 14073-97-3 | 69.04      |
|    |                                                      |            | 1443.46 ±  |
|    | 2-Methylpentadecane                                  | 1560-93-6  | 28.36      |
|    |                                                      | 1000080-   | 1343.14 ±  |
|    | 1-methylperhydrophenanthrene                         | 19-6       | 603.02     |
|    |                                                      |            | 4068.59 ±  |
| AC | 3,5-Octadien-2-one                                   | 30086-02-3 | 1426.36    |
|    |                                                      |            | 797.86 ±   |
|    | Methyleugenol                                        | 93-15-2    | 214.48     |
|    |                                                      |            | 2079.56 ±  |
| YF | Linalyl oxide                                        | 5989-33-3  | 564.94     |
|    |                                                      |            | 5632.69 ±  |
|    | Geranic acid                                         | 1022164    | 825.85     |

---

|          |          |           |
|----------|----------|-----------|
|          |          | 2261.82 ± |
| Geraniol | 106-24-1 | 731.24    |

---
